# Supplementary figures and images for: Increased Expression of LAMTOR5 Predicts Poor Prognosis and Is Associated with Lymph Node Metastasis of Head and Neck Squamous Cell Carcinoma
Source: PubMed Central journal article supplement — Int J Med Sci. 2019 Jun 2;16(6):783–92. doi: 10.7150/ijms.33415 (PMC6643113; doi:10.7150/ijms.33415), 2019-06-02

# Supplementary Fig 1

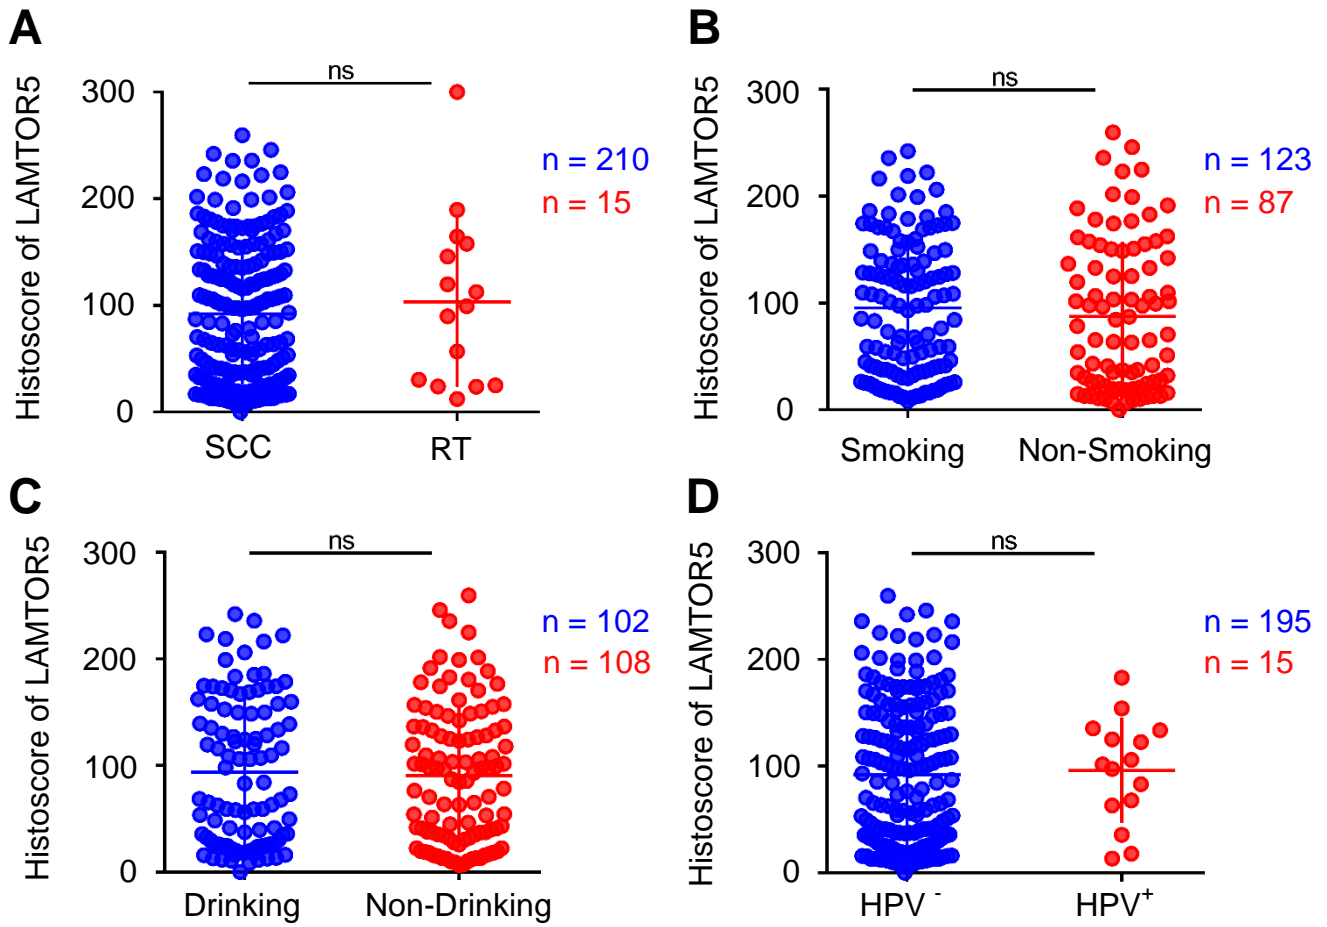

Supplement: ijmsv16p0783s1.pdf [file ijmsv16p0783s1.pdf]
